# Supplementary material
Source: publisher site journal article supplement (https://www.dovepress.com/article/214410)
Supplement: Supplementary file 1 [file get_supplementary_file.php]

SUPPLEMENTARY MATERIAL

**Translation and validation of PROactive instruments for COPD in French and influence of weather and pollution on its difficulty score**

***Cross-cultural translation procedure***

The first stage is the *forward translation* (*ft*) made by 2 bilingual translators with French as their mother tongue, one among them (F.H) being aware of the concepts being examined in the questionnaire and the other one (F.W, see acknowledgements) without any medical background and not aware of the concepts being examined. Each of them were invited to translate the questionnaire into the target French language. The second stage was a meeting with a medical doctor (A.C, last author), 2 professors from Faculty of Sport Sciences (F.H and V.T-O, see co-authors), and one bilingual English-French person without medical background (F.W). The group set up a *first proposal* from both *ft* versions considering and debating all discrepancies between them. The third stage aimed at producing a *back translation (bt)* version from the French *ft* version to English. For this, two *bt* versions were provided by two independent bilingual translators with English as their mother tongue (E.F and R.A, see acknowledgements). These translators who did not have any medical background were not aware of the original questionnaire and were naïve to the concept of the study. The fourth stage produced the *pre-final* C- and D-PPAC versions in French from the *ft*, *first proposal* and *bt* debated by the committee of expertise that included all the translators as well as the investigators of the study. The questions in C- and D-PPAC were numbered to make the identification of questions easy. This version of C-PPAC was evaluated among the patients in the fifth stage.

The sixth stage resulted into few modifications in the pre-final version in accordance to the developers. Some phrases in the Introductory part and few questions were simplified. To avoid any discrepancies and to ensure that the patients had clarity on the answers, the items “a little bit” and “some” were re-verified via a cognitive debriefing with 16 COPD patients from FFAAIR[[1]](#footnote-2) and out-patient department. “Un petit peu” was preferred when the order was ‘*None at all, a little bit, some, a lot, a great deal*’ whereas “Un peu” was preferred for the order *‘Not at all, a little bit, moderately, very, extremely’*. However, in the objective of providing uniformity of answering options, and taking into account the semantic of translated words in the French culture, “un petit peu” was decided as the option that fits the best for “a little bit” in both C- and D-PPAC. Similarly, different options were preferred for “some”. If “quelques-unes” was preferred for the 2nd question (C-PPAC), “quelques difficultés” was preferred for 3rd question (C- and D-PPAC) and 4th question (C-PPAC). “Quelques-unes” was selected as a common translation for “some” in these questions.

***Comprehensibility***

After each question in C-PPAC, the patients replied to the following *question “Did you find this question clear? (check the box corresponding to your answer)”.* The requested response ranged from 0 to 5 where 0 being ‘not at all clear’ to 5 being ‘absolutely clear’. The patients could also write comments or suggestions on each translated question.

***Weather conditions and atmospheric pollution***

The “Metro France”, a French public service of meteorology and climatology, provided minimum and maximum temperature (°C), rainfall (in mm), and sunshine duration.1 The calculation of duration of daylight time was based on the formula from the CSIRO (Commonwealth Scientific and Industrial Research Organisation) Biosphere model as described in Statistical analysis section.2 The “Atmo France” provided the daily measures and the composite ATMO index (particulate matter below 10µm – PM10, ozone – O3, nitrogen and sulphur dioxides – NO2 and SO2 respectively) that ranged from 0 (very good) to 10 (very bad quality).3

***Statistical analysis***

Duration of daylight2:

where, p = day length coefficient (0.8333°) [definition of day length by US government]

L = latitude *(www.google.com/earth/)*

Φ = sin-1[0.39795 cosϴ]

ϴ = 0.2163108 + 2 tan-1[0.9671396 tan {0.00860 * (J-186)}]

J = day of the year

**Results**

***Comprehensibility***

Some comments regarding 1st question in C-PPAC were as follows:

*“I walked a little bit, but not every day; hesitation between ‘Not at all’ and ‘A little bit’ -*Patient MM (Likert 4)

*“Maybe take into account that we have done one or two good walks in the week but not every day”* –Patient CL (Likert 4)

*“I walked for one hour but only one day this week”* –Patient JMP (Likert 2)

Similarly, the 4th question in C-PPAC regarding the difficulty experienced in getting out and about also attracted some comments:

*“Difficulty to leave due to respiratory problem or lack of motivation?”* –Patient LA (Likert 3)

*“What do you mean by going out (on foot or by car)?”* –Patient JLM (Likert 5)

*“Examples for ‘going out of your home’?”* –Patient MJB (Likert 3)

*“Difficulties related to (physical, mental, respiratory problem, weather etc.)?”* –Patient MTL (Likert 3) [This subject was excluded from the analysis as there was no response given for this particular question.]

**References**

1. Previsions Météo France. Available from: http://www.meteofrance.com/accueil. Accessed August 30, 2019.

2. Demeyer H, Burtin C, Van Remoortel H, et al. Standardizing the analysis of physical activity in patients with COPD following a pulmonary rehabilitation program. *Chest*. 2014;146(2):318-327. doi:10.1378/chest.13-1968

3. Fédération ATMO France. Available from: http://www.atmo-france.org/fr/. Accessed August 30, 2019.

**Version finale en français du C-PPAC**

| **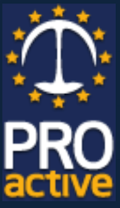** | **[ACTIVITÉ PHYSIQUE PROACTIVE](https://erj.ersjournals.com/content/early/2015/05/28/09031936.00183014)**  **[LORS DE LA CONSULTATION DU PATIENT BPCO : C-PPAC](https://erj.ersjournals.com/content/early/2015/05/28/09031936.00183014)** |
| --- | --- |

INSTRUCTIONS POUR LES PATIENTS :

Les patients souffrant d’une maladie pulmonaire chronique comme vous signalent qu’ils connaissent des problèmes au cours de leurs activités physiques. Par activités physiques, nous entendons toutes les activités nécessitant un mouvement de votre corps. (Exemples : les activités domestiques, la marche, aller au travail ou s’habiller). Veuillez prendre en compte toutes les activités que vous réalisez, et pas seulement ces exemples. Nous aimerions savoir comment vous avez vécu vos activités physiques AU COURS DES 7 DERNIERS JOURS.

Veuillez cocher la case de la réponse qui vous correspond le mieux AU COURS DES 7 DERNIERS JOURS.

Il n’y a pas de mauvaise réponse. Nous vous remercions de votre participation.

|  |  | | | | | **Score** | **Score** |
| --- | --- | --- | --- | --- | --- | --- | --- |
|  |  | | | | | **difficulté** | **quantité** |
| Au cours des 7 derniers jours, avez-vous marché à l’extérieur ? | | | | | |  |  |
|  | Pas du tout | | | | |  | 0 |
|  | Un petit peu (environ 10 minutes chaque jour) | | | | |  | 1 |
|  | Un peu (environ 30 minutes chaque jour) | | | | |  | 2 |
|  | Beaucoup (environ 1 heure chaque jour) | | | | |  | 3 |
|  | Enormément (plus d’1 heure chaque jour) | | | | |  | 3 |
| Au cours des 7 derniers jours, avez-vous effectué des tâches à l’extérieur ? (exemples : le jardinage, sortir les poubelles ou faire des petites courses) | | | | | |  |  |
|  | Aucune | | | | |  | 0 |
|  | Très peu | | | | |  | 1 |
|  | Quelques-unes | | | | |  | 2 |
|  | Beaucoup | | | | |  | 3 |
|  | Enormément | | | | |  | 4 |
| Au cours des 7 derniers jours, avez-vous eu des difficultés pour vous habiller ? | | | | | |  |  |
|  | Pas du tout | | | | | 4 |  |
|  | Un petit peu | | | | | 3 |  |
|  | Quelques-unes | | | | | 2 |  |
|  | Beaucoup | | | | | 1 |  |
|  | Enormément | | | | | 0 |  |
| Au cours des 7 derniers jours, avez-vous eu des difficultés pour sortir de chez vous ? | | | | | |  |  |
|  | Pas du tout | | | | | 4 |  |
|  | Un petit peu | | | | | 3 |  |
|  | Quelques-unes | | | | | 2 |  |
|  | Beaucoup | | | | | 1 |  |
|  | Enormément | | | | | 0 |  |
| Au cours des 7 derniers jours, avez-vous évité des activités à cause de vos problèmes respiratoires ? | | | | | |  |  |
|  | Jamais | | | | | 4 |  |
|  | Rarement | | | | | 3 |  |
|  | Quelques fois | | | | | 2 |  |
|  | Fréquemment | | | | | 1 |  |
|  | Tout le temps | | | | | 0 |  |
| Au cours des 7 derniers jours, étiez-vous essoufflé(e) en général durant vos activités ? | | | | | |  |  |
|  | Pas du tout | | | | | 4 |  |
|  | Un petit peu | | | | | 3 |  |
|  | Modérément | | | | | 2 |  |
|  | Très | | | | | 1 |  |
|  | Extrêmement | | | | | 0 |  |
| Au cours des 7 derniers jours, avez-vous manqué de force pour effectuer des tâches à cause de vos problèmes respiratoires ? | | | | | |  |  |
|  | Jamais | | | | | 4 |  |
|  | Rarement | | | | | 3 |  |
|  | Quelques fois | | | | | 2 |  |
|  | Fréquemment | | | | | 1 |  |
|  | Tout le temps | | | | | 0 |  |
| Au cours des 7 derniers jours, étiez-vous fatigué(e) en général durant vos activités ? | | | | | |  |  |
|  | Pas du tout | | | | | 4 |  |
|  | Un petit peu | | | | | 3 |  |
|  | Modérément | | | | | 2 |  |
|  | Très | | | | | 1 |  |
|  | Extrêmement | | | | | 0 |  |
| Au cours des 7 derniers jours, avez-vous du faire des pauses pendant vos activités physiques ? | | | | | |  |  |
|  | Jamais | | | | | 4 |  |
|  | Rarement | | | | | 3 |  |
|  | Quelques fois | | | | | 2 |  |
|  | Fréquemment | | | | | 1 |  |
|  | Tout le temps | | | | | 0 |  |
| Au cours des 7 derniers jours, étiez-vous essoufflé(e) lors de la marche sur terrain plat, à l’intérieur et à l’extérieur ? | | | | | |  |  |
|  | Pas du tout | | | | | 4 |  |
|  | Un petit peu | | | | | 3 |  |
|  | Modérément | | | | | 2 |  |
|  | Très | | | | | 1 |  |
|  | Extrêmement | | | | | 0 |  |
| Au cours des 7 derniers jours, combien de temps vous a-t-il fallu pour récupérer de vos activités physiques ? | | | | | |  |  |
|  | Aucun | | | | | 4 |  |
|  | Un petit peu | | | | | 3 |  |
|  | Un peu | | | | | 2 |  |
|  | Beaucoup | | | | | 1 |  |
|  | Enormément | | | | | 0 |  |
| Au cours des 7 derniers jours, avez-vous eu besoin de prendre en compte vos problèmes respiratoires lorsque vous avez planifié vos activités ? (exemples : une sortie, un rendez-vous ou recevoir des invités) | | | | | |  |  |
|  | Non | | | | | 4 |  |
|  | Un petit peu | | | | | 3 |  |
|  | Quelques fois | | | | | 2 |  |
|  | Beaucoup | | | | | 1 |  |
|  | Enormément | | | | | 0 |  |
| Score hebdomadaire de pas | | | Mesuré par Actigraph | | Mesuré par Dynaport |  |  |
|  | 0 | **PAS (médiane hebdomadaire)** | <1000 | | <1500 |  | 0 |
|  | 1 | 1000-2000 | | 1500-2500 |  | 1 |
|  | 2 | 2000-4000 | | 2500-4500 |  | 2 |
|  | 3 | 4000-6000 | | 4500-6500 |  | 3 |
|  | 4 | >6000 | | >6500 |  | 4 |
| Score hebdomadaire VMU | | | Mesuré par Actigraph | | Mesuré par Dynaport |  |  |
|  | 0 | **VMU (médiane hebdomadaire)** | <100 | | <60 |  | 0 |
|  | 1 | 100-200 | | 60-130 |  | 1 |
|  | 2 | 200-300 | | 130-210 |  | 2 |
|  | 3 | 300-500 | | 210-370 |  | 3 |
|  | 4 | >500 | | >370 |  | 4 |
|  | | | | Scores quantité (somme) : | |  |  |
|  | | | | Scores difficulté (somme) : | |  |  |
|  | | | | **Total des scores** (sommes) : | |  |  |

**Version finale en français du D-PPAC**

| **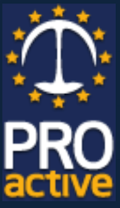** | **[ACTIVITÉ PHYSIQUE](https://erj.ersjournals.com/content/early/2015/05/28/09031936.00183014)**  **[PROACTIVE JOURNALIÈRE DU PATIENT BPCO : D-PPAC](https://erj.ersjournals.com/content/early/2015/05/28/09031936.00183014)** |
| --- | --- |

INSTRUCTIONS POUR LES PATIENTS :

Les patients souffrant d’une maladie pulmonaire chronique comme vous signalent qu’ils connaissent des problèmes au cours de leurs activités physiques. Par activités physiques, nous entendons toutes les activités nécessitant un mouvement de votre corps. (Exemples : les activités domestiques, la marche, aller au travail ou s’habiller). Veuillez prendre en compte toutes les activités que vous réalisez, et pas seulement ces exemples. Nous aimerions savoir comment vous avez vécu vos activités physiques depuis que vous vous êtes réveillé(e) AUJOURD’HUI.

Veuillez remplir ce questionnaire le soir avant de vous coucher. Veuillez cocher la case de la réponse qui vous correspond le mieux AUJOURD’HUI.

Il n’y a pas de mauvaise réponse. Nous vous remercions de votre participation.

INSTRUCTIONS POUR LES JOURS SUIVANTS :

Nous aimerions savoir comment vous avez vécu vos activités physiques depuis que vous vous êtes réveillé(e) AUJOURD’HUI. Veuillez remplir ce questionnaire le soir avant de vous coucher. Veuillez cocher la case de la réponse qui vous correspond le mieux AUJOURD’HUI.

|  |  | | | | | **Score** | **Score** |
| --- | --- | --- | --- | --- | --- | --- | --- |
|  |  | | | | | **difficulté** | **quantité** |
| Avez-vous marché à l’extérieur aujourd’hui ? | | | | | |  |  |
|  | Pas du tout | | | | |  | 0 |
|  | Un petit peu (jusqu’à 10 minutes au total) | | | | |  | 1 |
|  | Un peu (jusqu’à 30 minutes au total) | | | | |  | 2 |
|  | Beaucoup (jusqu’à 1 heure au total) | | | | |  | 3 |
|  | Enormément (plus d’1 heure au total) | | | | |  | 4 |
| Avez-vous effectué des tâches à l’extérieur aujourd’hui ? (exemples : le jardinage, sortir les poubelles ou effectuer de petites courses) | | | | | |  |  |
|  | Aucune | | | | |  | 0 |
|  | Très peu | | | | |  | 1 |
|  | Quelques-unes | | | | |  | 2 |
|  | Beaucoup | | | | |  | 3 |
|  | Enormément | | | | |  | 4 |
| Avez-vous eu des difficultés pour vous habiller aujourd’hui ? | | | | | |  |  |
|  | Pas du tout | | | | | 4 |  |
|  | Un petit peu | | | | | 3 |  |
|  | Quelques-unes | | | | | 2 |  |
|  | Beaucoup | | | | | 1 |  |
|  | Enormément | | | | | 0 |  |
| Avez-vous évité des activités à cause de vos problèmes respiratoires aujourd’hui ? | | | | | |  |  |
|  | Jamais | | | | | 4 |  |
|  | Rarement | | | | | 3 |  |
|  | Quelques fois | | | | | 2 |  |
|  | Fréquemment | | | | | 1 |  |
|  | Tout le temps | | | | | 0 |  |
| Etiez-vous essoufflé(e) en général durant vos activités aujourd’hui ? | | | | | |  |  |
|  | Pas du tout | | | | | 4 |  |
|  | Un petit peu | | | | | 3 |  |
|  | Modérément | | | | | 2 |  |
|  | Très | | | | | 1 |  |
|  | Extrêmement | | | | | 0 |  |
| Etiez-vous fatigué(e) en général durant vos activités aujourd’hui ? | | | | | |  |  |
|  | Pas du tout | | | | | 4 |  |
|  | Un petit peu | | | | | 3 |  |
|  | Modérément | | | | | 2 |  |
|  | Très | | | | | 1 |  |
|  | Extrêmement | | | | | 0 |  |
| Avez-vous du faire des pauses pendant vos activités physiques aujourd’hui ? | | | | | |  |  |
|  | Jamais | | | | | 4 |  |
|  | Rarement | | | | | 3 |  |
|  | Quelques fois | | | | | 2 |  |
|  | Fréquemment | | | | | 1 |  |
|  | Tout le temps | | | | | 0 |  |
| Score quotidien de pas | | | Mesuré par Actigraph | | Mesuré par Dynaport |  |  |
|  | 0 | **PAS** | <1000 | | <1900 |  | 0 |
|  | 1 | 1000-3000 | | 1900-3700 |  | 1 |
|  | 2 | 3000-5000 | | 3700-5500 |  | 2 |
|  | 3 | 5000-7000 | | 5500-7300 |  | 3 |
|  | 4 | >7000 | | >7300 |  | 4 |
| Score quotidien VMU | | | Mesuré par Actigraph | | Mesuré par Dynaport |  |  |
|  | 0 | **VMU** | <100 | | <50 |  | 0 |
|  | 1 | 100-200 | | 50-110 |  | 1 |
|  | 2 | 200-300 | | 110-190 |  | 2 |
|  | 3 | 300-400 | | 190-270 |  | 3 |
|  | 4 | 400-600 | | 270-440 |  | 4 |
|  | 5 | >600 | | >440 |  | 5 |
|  | | | | Scores quantité (somme) : | |  |  |
|  | | | | Scores difficulté (somme) : | |  |  |
|  | | | | **Total des scores** (sommes) : | |  |  |

Copyright permission from the PROactive consortium is required to reproduce the items.

1. Fédération Française des Associations et Amicales d’Insuffisants Respiratoires [↑](#footnote-ref-2)
